# Supplementary material for: Non-isocyanate polyurethane/epoxy hybrid materials with different and controlled architectures prepared from a CO2-sourced monomer and epoxy via an environmentally-friendly route
Source: Royal Society of Chemistry journal article supplement (doi:10.1039/c7ra04215a), 2017-01-01
Supplement: c7ra04215a1.pdf [file c7ra04215a1.pdf]

## SUPPORTING INFORMATION

### The non-isocyanate polyurethane/epoxy hybrid materials with different and controlled architectures prepared from CO<sub>2</sub>-sourced monomer and epoxy via an environment-friendly route

Jiexi Ke <sup>a,b</sup>, Xiaoyun Li <sup>a,b</sup>, Feng wang <sup>a</sup>, Shuai Jiang <sup>a,b</sup>, Maoqing Kang <sup>a</sup>, Junwei Wang <sup>a, c\*</sup>,  
Qifeng Li <sup>a</sup>, Zhijie Wang <sup>c</sup>

<sup>a</sup> Institute of Coal Chemistry, Chinese Academy of Sciences, Taiyuan 030001, China

<sup>b</sup> University of Chinese Academy of Sciences, Beijing 100049, China

<sup>c</sup> National Engineering Research Center for Coal-Based Synthesis, Changzhi, 030001, China

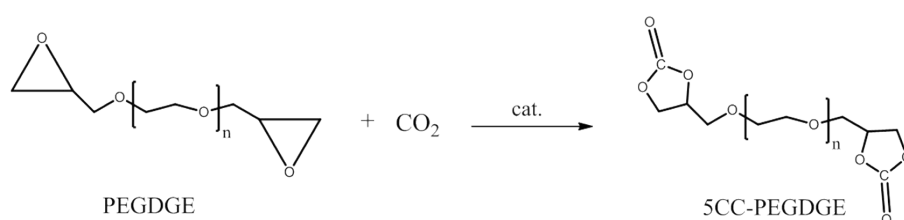

**Scheme S1** The scheme of synthesis of 5CC-PEGDGE

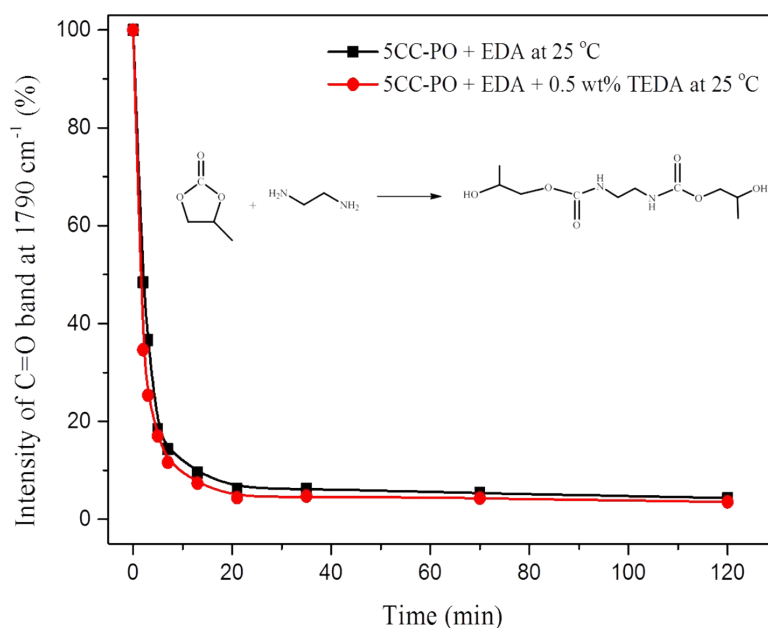

**Fig. S1** Kinetics of ring-opening reaction of 5CC-PO with EDA at 25 °C

\* Corresponding author at: Institute of Coal Chemistry, Chinese Academy of Sciences, Taiyuan 030001, China.

E-mail address: [wangjw@sxicc.ac.cn](mailto:wangjw@sxicc.ac.cn) (J.-W. Wang).

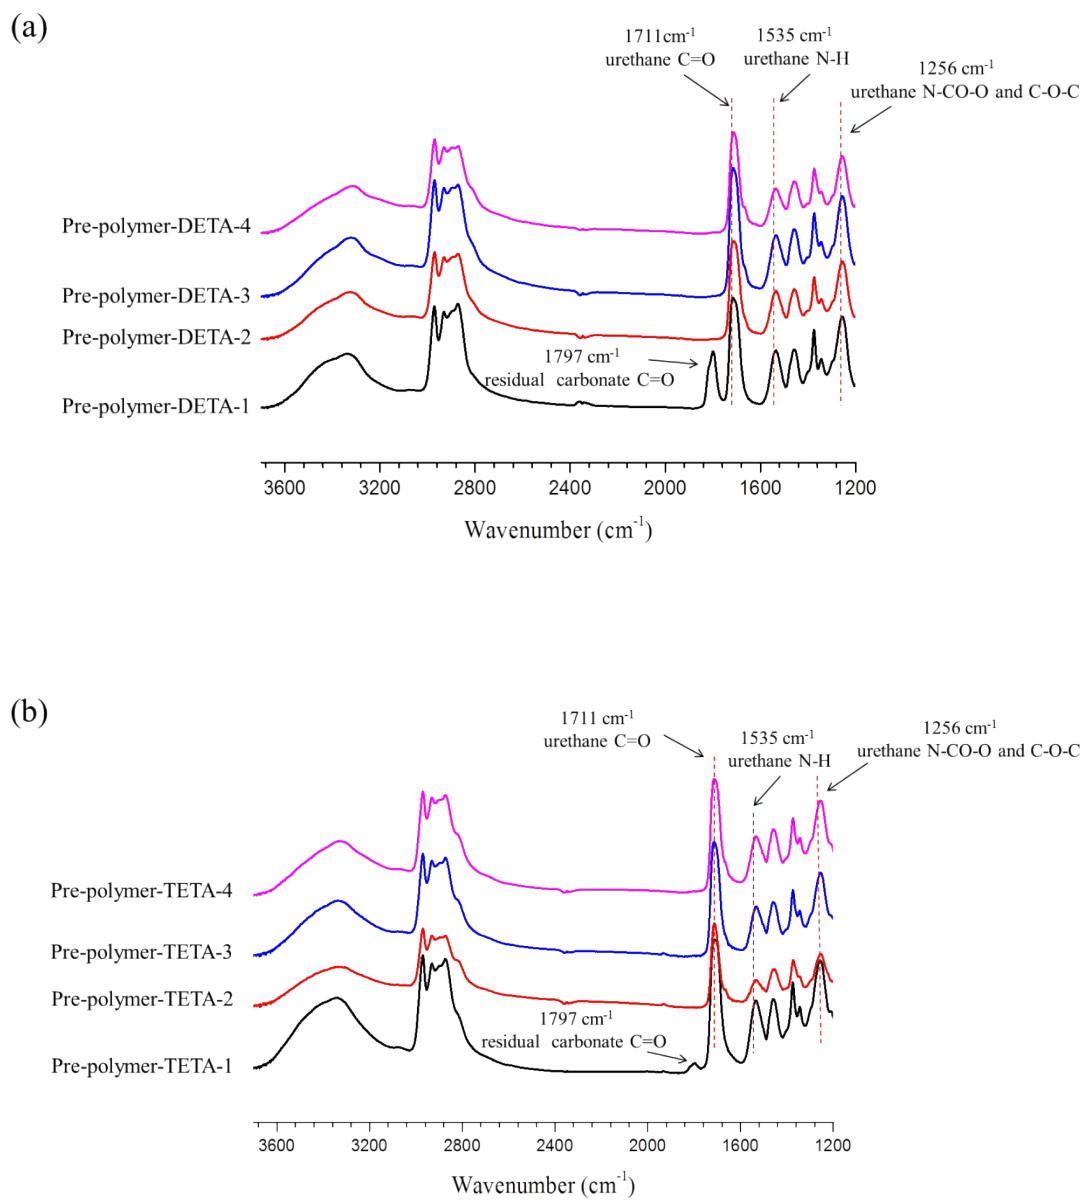

**Fig. S2** FTIR spectra of a) DETA-based pre-polymers, b) TETA-based pre-polymers.

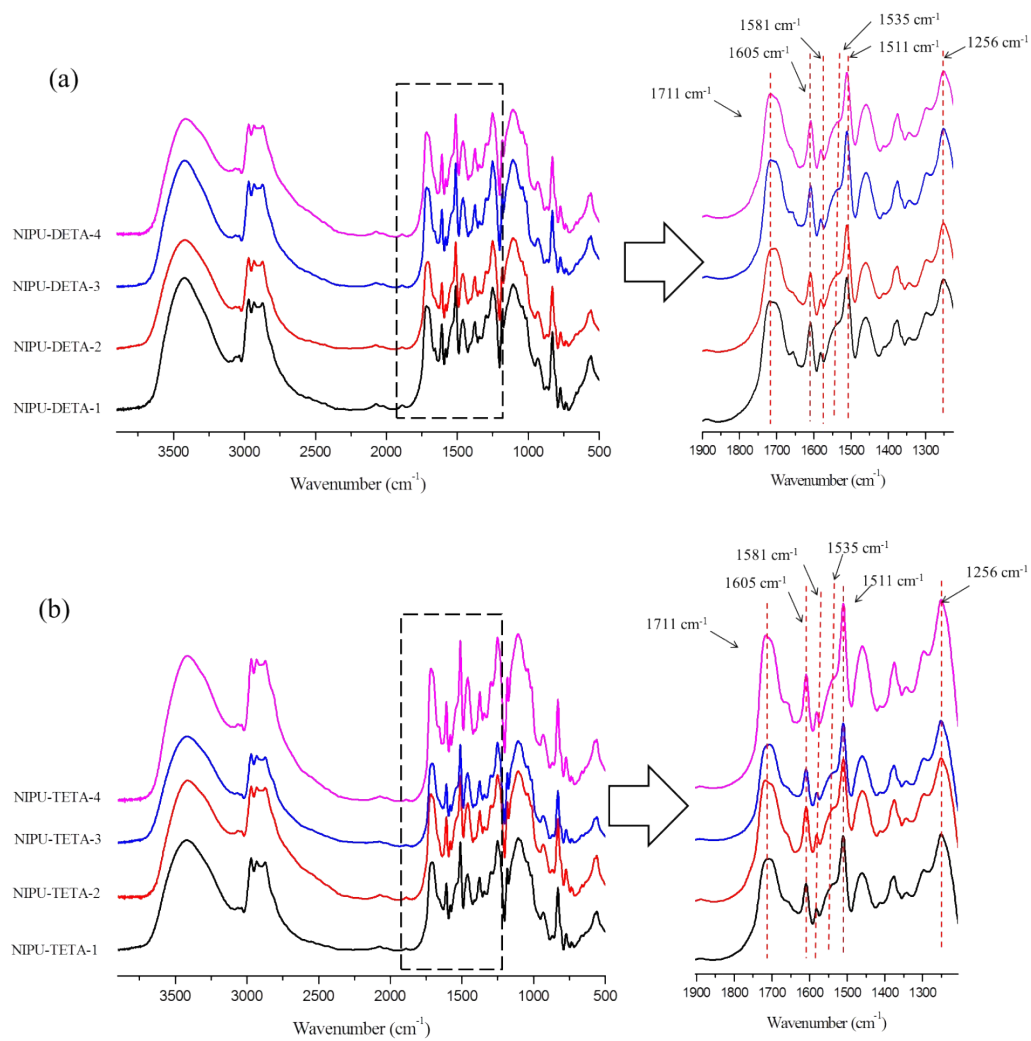

**Fig. S3** FTIR spectra of a) DETA-based hybrid materials, b) TETA-based hybrid materials.

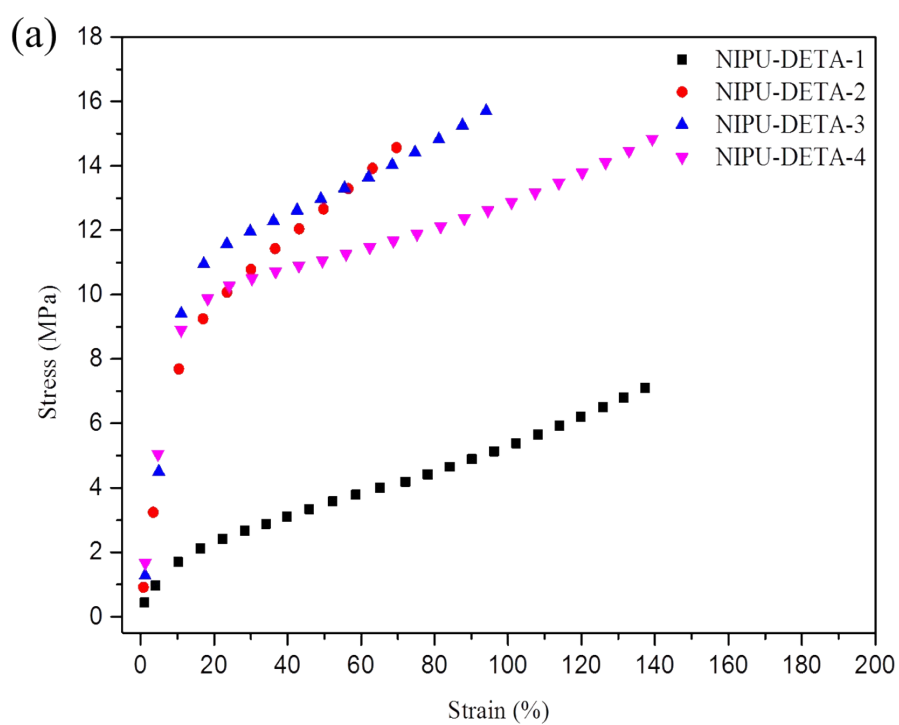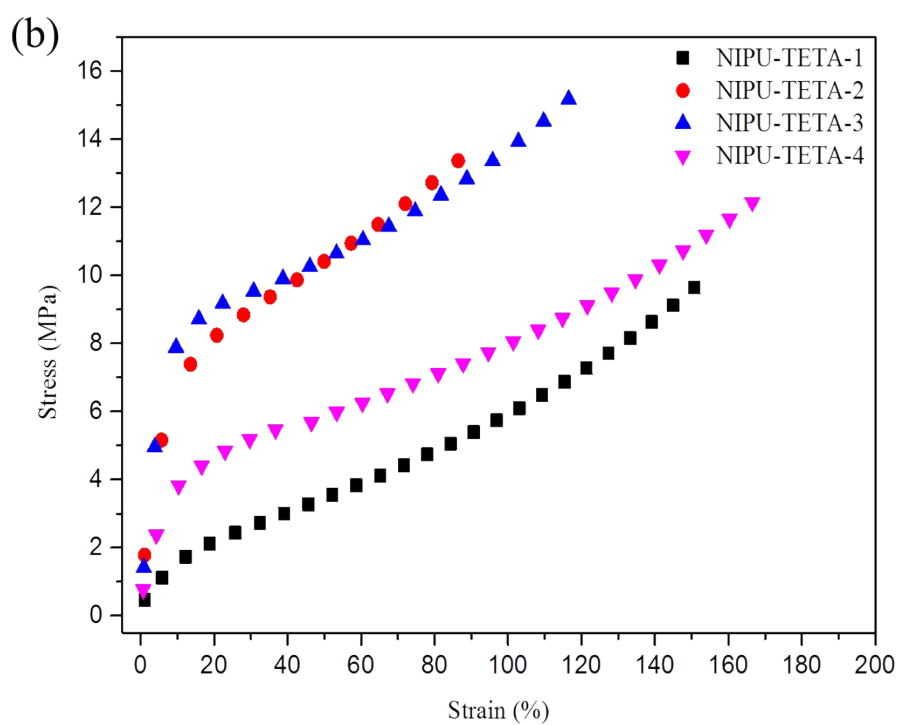

**Fig. S4** Stress-strain curves of a) DETA-based hybrid materials, b) TETA-based hybrid materials.

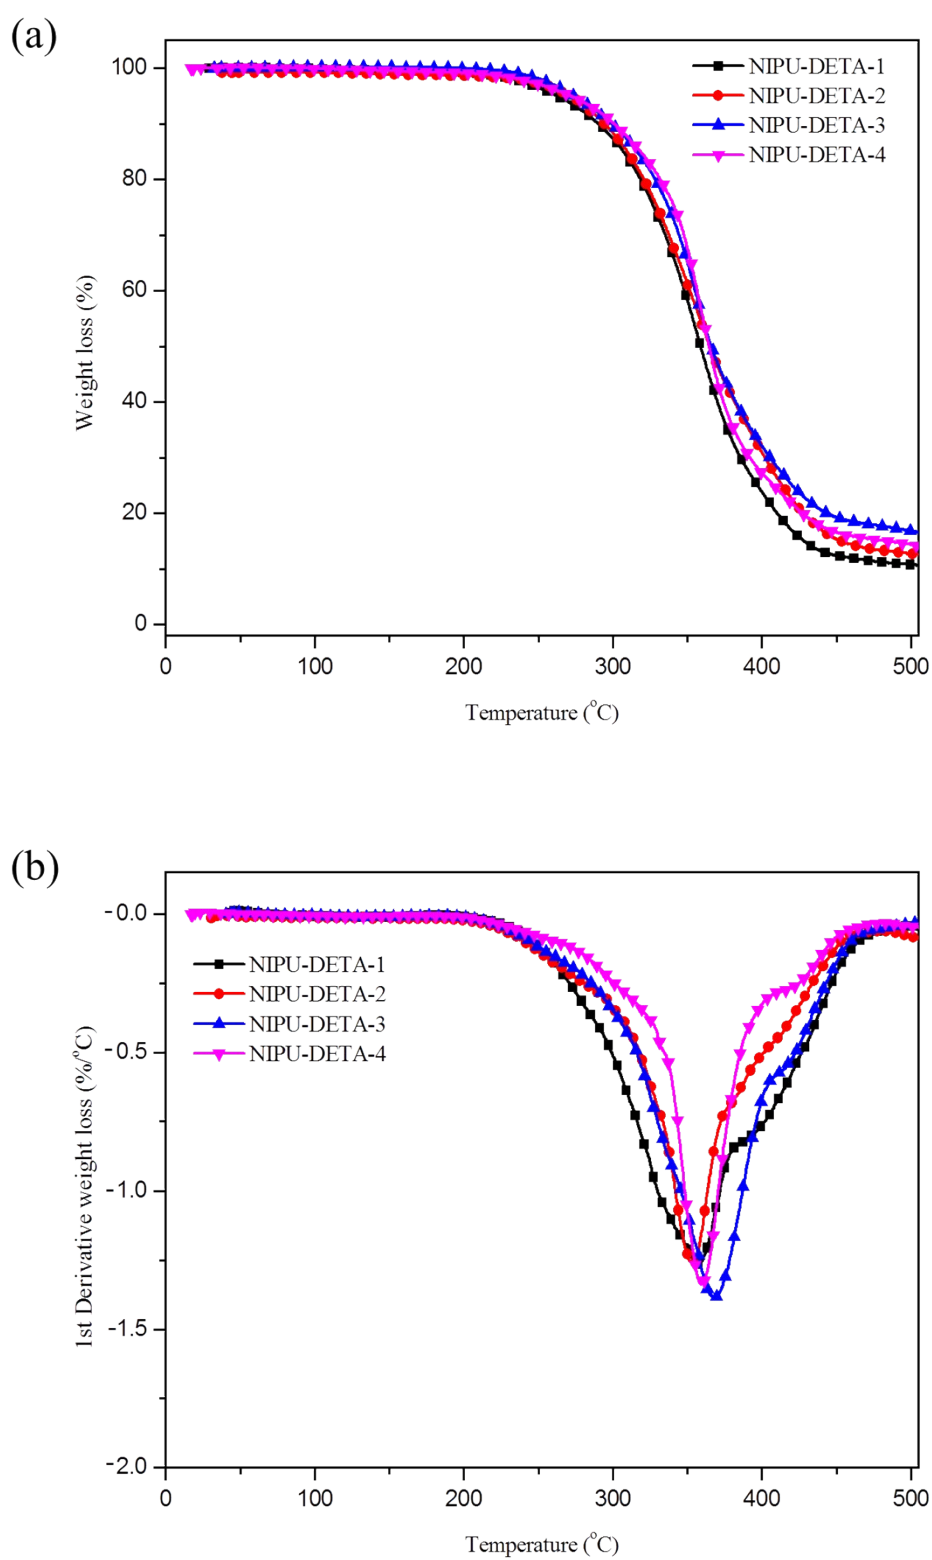

**Fig. S5** TGA (a) and DTGA (b) curves of DETA-based hybrid materials under nitrogen

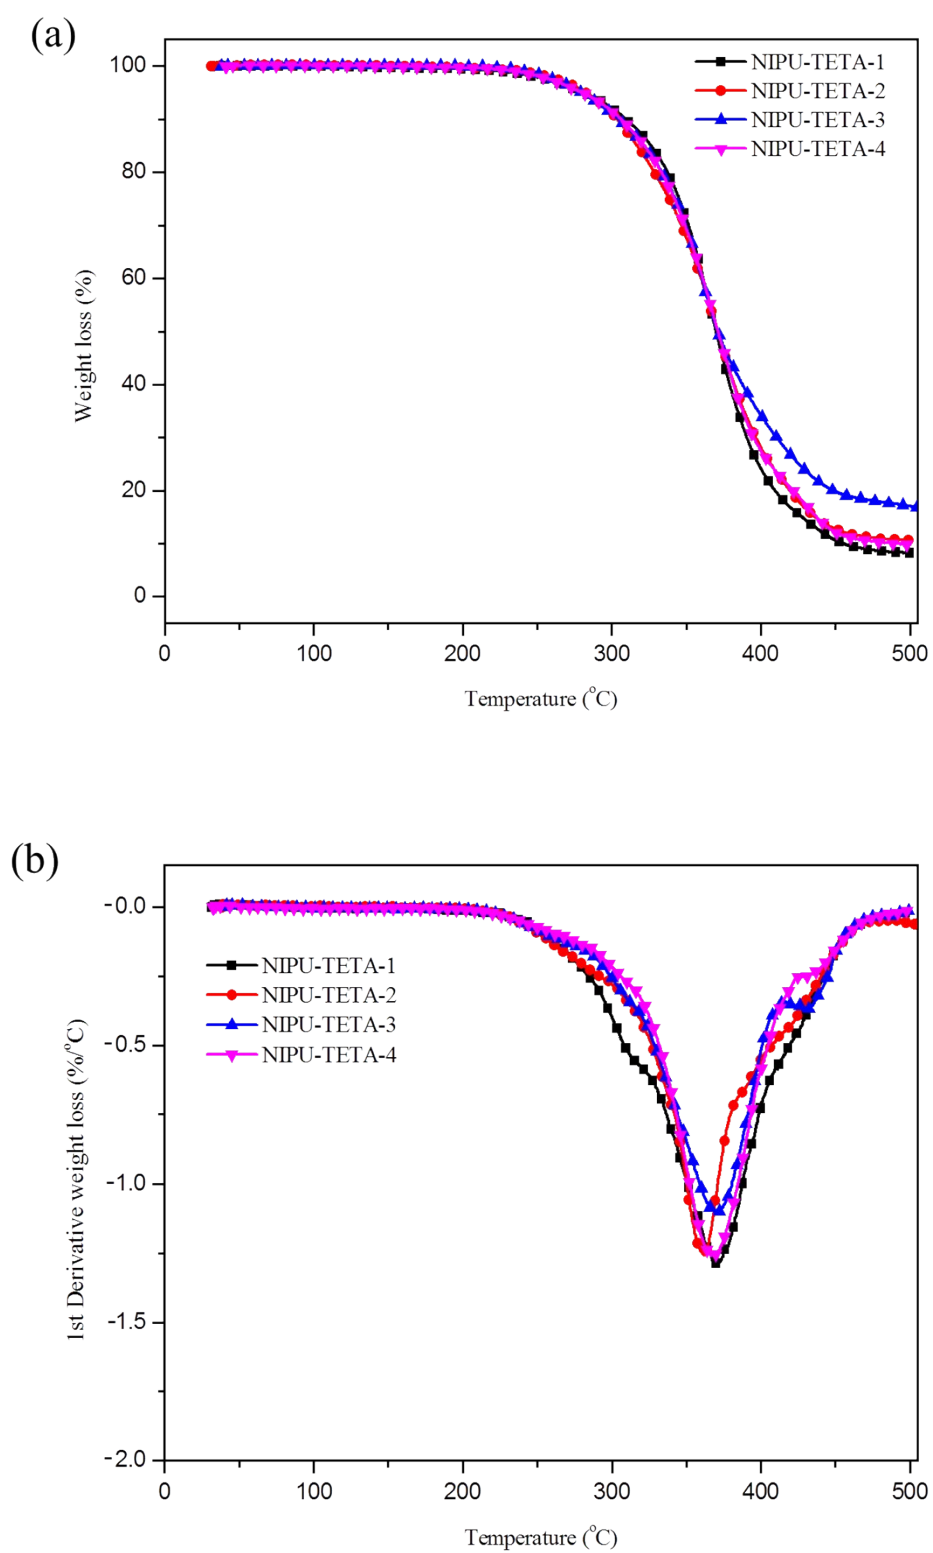

**Fig. S6** TGA (a) and DTGA (b) curves of TETA-based hybrid materials under nitrogen
